# Supplementary material for: Methylation-regulated miR-124-1 suppresses tumorigenesis in hepatocellular carcinoma by targeting CASC3
Source: PubMed Central journal article supplement (PMC5041962; doi:10.18632/oncotarget.8266), 2016-03-22
Supplement: oncotarget-07-26027-s001.pdf [file oncotarget-07-26027-s001.pdf]

## SUPPLEMENTARY TABLES

Supplementary Table 1: Primers for MSP and Real-time stem-loop RT- PCR

| Gene           | MSP/USP           | Primer Sequence                                    |                           | Length |
|----------------|-------------------|----------------------------------------------------|---------------------------|--------|
|                |                   | Forward (5'-3')                                    | Reverse (5'-3')           |        |
| miR-124-1      | MSP               | AGAGGATTGTAGTAGGCGAGTTTC                           | AACGAAAAACAAAAAAAAACAACG  | 190    |
|                | USP               | GAGGATTGTAGTAGGTGAGTTTTGG                          | ACAAAAACAAAAAAAAACAACAAA  | 188    |
|                | COBRA             | AGTAGATTTATTGTTTTTGGTTGGG                          | CCACAAAAACAAATAAAAAACAATC | 241    |
| Gene           |                   | Primer Sequence                                    |                           | Length |
| miR-124-1      | RT primer (5'-3') | GTCGTATCCAGTGCAGGGTCCGAGGTATTCGCACTGGATACGACATCAAG |                           |        |
|                | Forward (5'-3')   | CGCCGTGTTACAGCGGAC                                 |                           | 87     |
|                | Reverse (5'-3')   | GTGCAGGGTCCGAGGT                                   |                           |        |
| U6             | RT primer (5'-3') | CGTTCACGAATTTGCGTGTCAT                             |                           |        |
|                | Forward (5'-3')   | GCTTCGGCAGCACATATACTAAAAT                          |                           | 89     |
|                | Reverse (5'-3')   | CGCTTCACGAATTTGCGTGTCAT                            |                           |        |
| CASC3          | Forward (5'-3')   | ACCTCGGAAAGGGCTCTTCTT                              |                           | 105    |
|                | Reverse (5'-3')   | CGACCCTCATCCTTCCATAGC                              |                           |        |
| $\beta$ -actin | Forward (5'-3')   | CTGGAACGGTGAAGGTGACA                               |                           | 140    |
|                | Reverse (5'-3')   | AAGGGACTTCCTGTAACAATGCA                            |                           |        |

Supplementary Table 2. Literatures concerning analysis of the genomic instability of HCC

See Supplementary File 1

Supplementary Table 3: The most common chromosomal losses in HCC

| Chromosome | Loss numbers | Total numbers | Incidence rate |
|------------|--------------|---------------|----------------|
| 1p         | 325          | 791           | 0.410872       |
| 4q         | 820          | 1709          | 0.479813       |
| 6q         | 157          | 439           | 0.357631       |
| 8q         | 886          | 1840          | 0.481522       |
| 13q        | 349          | 917           | 0.380589       |
| 16q        | 657          | 1412          | 0.465297       |
| 17q        | 494          | 1078          | 0.458256       |
| 19p        | 23           | 62            | 0.370968       |
